# Supplementary material for: Transcriptome analysis of food habit transition from carnivory to herbivory in a typical vertebrate herbivore, grass carp Ctenopharyngodon idella
Source: PubMed Central journal article supplement (PMC4307112; doi:10.1186/s12864-015-1217-x), 2015-01-22

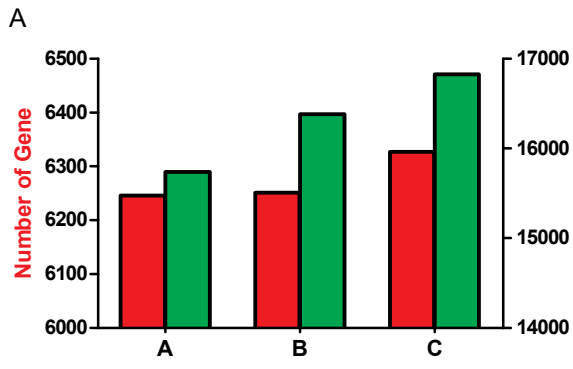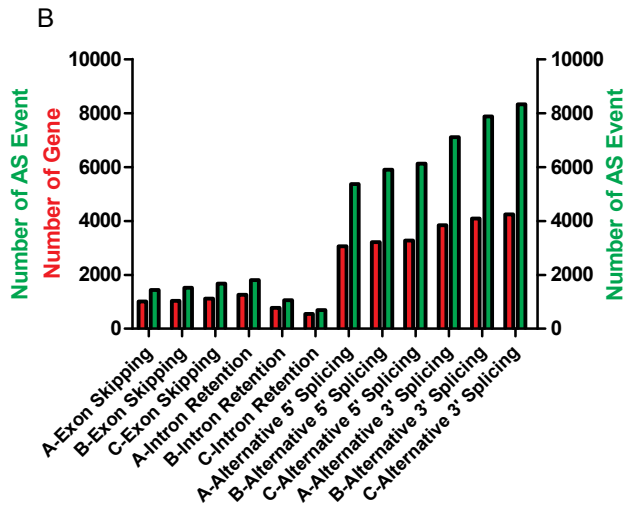

Supplement: 12864_2015_1217_MOESM3_ESM.pdf [file 12864_2015_1217_MOESM3_ESM.pdf]
